# Supplementary material for: Farnesoid X receptor activation promotes cell proliferation via PDK4-controlled metabolic reprogramming
Source: PubMed Central journal article supplement (PMC4700422; doi:10.1038/srep18751), 2016-01-05
Supplement: srep18751-s1.pdf [file srep18751-s1.pdf]

Farnesoid X receptor activation promotes cell proliferation via PDK4-controlled metabolic reprogramming

Yang Xie<sup>1,2#</sup>, Hong Wang<sup>1#</sup>, Xuefang Cheng<sup>1</sup>, Yuzheng Wu<sup>1</sup>, Lijuan Cao<sup>1</sup>, Mengqiu Wu<sup>1</sup>, Wen Xie<sup>2</sup>, Guangji Wang<sup>1\*</sup>, Haiping Hao<sup>1\*</sup>

<sup>1</sup>State Key Laboratory of Natural Medicines, Key Laboratory of Drug Metabolism and Pharmacokinetics, China Pharmaceutical University, Nanjing 210009, China.

<sup>2</sup>Center for Pharmacogenetics and Department of Pharmaceutical Sciences, University of Pittsburgh School of Pharmacy, Pittsburgh, Pennsylvania 15261, USA.

\*Corresponding author: Telephone: +86-25-83271179, Fax: +86-25-83271060, Email: [hhp\\_770505@hotmail.com](mailto:hhp_770505@hotmail.com) (H. Hao) or [guangjiwang@hotmail.com](mailto:guangjiwang@hotmail.com) (G. Wang)

# These authors contribute equally to this work.

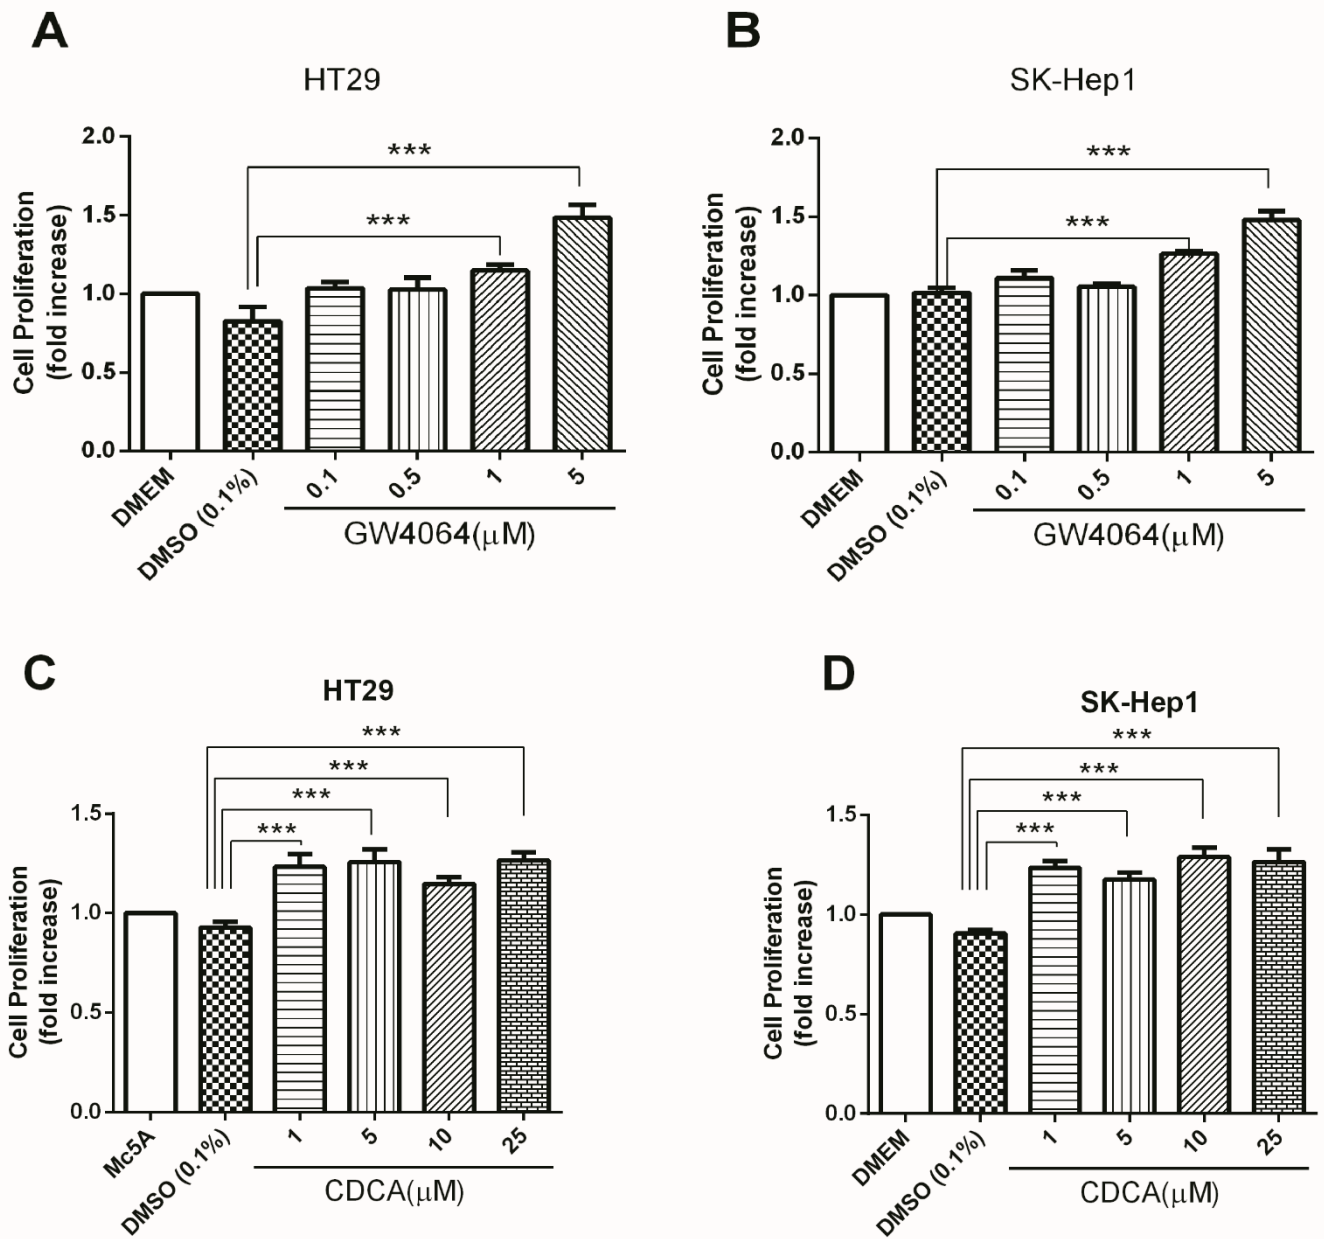

**Fig. S1 FXR agonists trigger proliferation of cell lines.** (A) HT29 cells were treated with different concentrations of GW4064. (B) SK-Hep1 cells were treated with different concentrations of GW4064. (C) HT29 cells were treated with different concentrations of CDCA. (D) SK-Hep1 cells were treated with different concentrations of CDCA. Values are presented with mean  $\pm$  SD (n=6; \*,  $P < 0.05$ ; \*\*,  $P < 0.01$ ; \*\*\*,  $P < 0.001$ ).

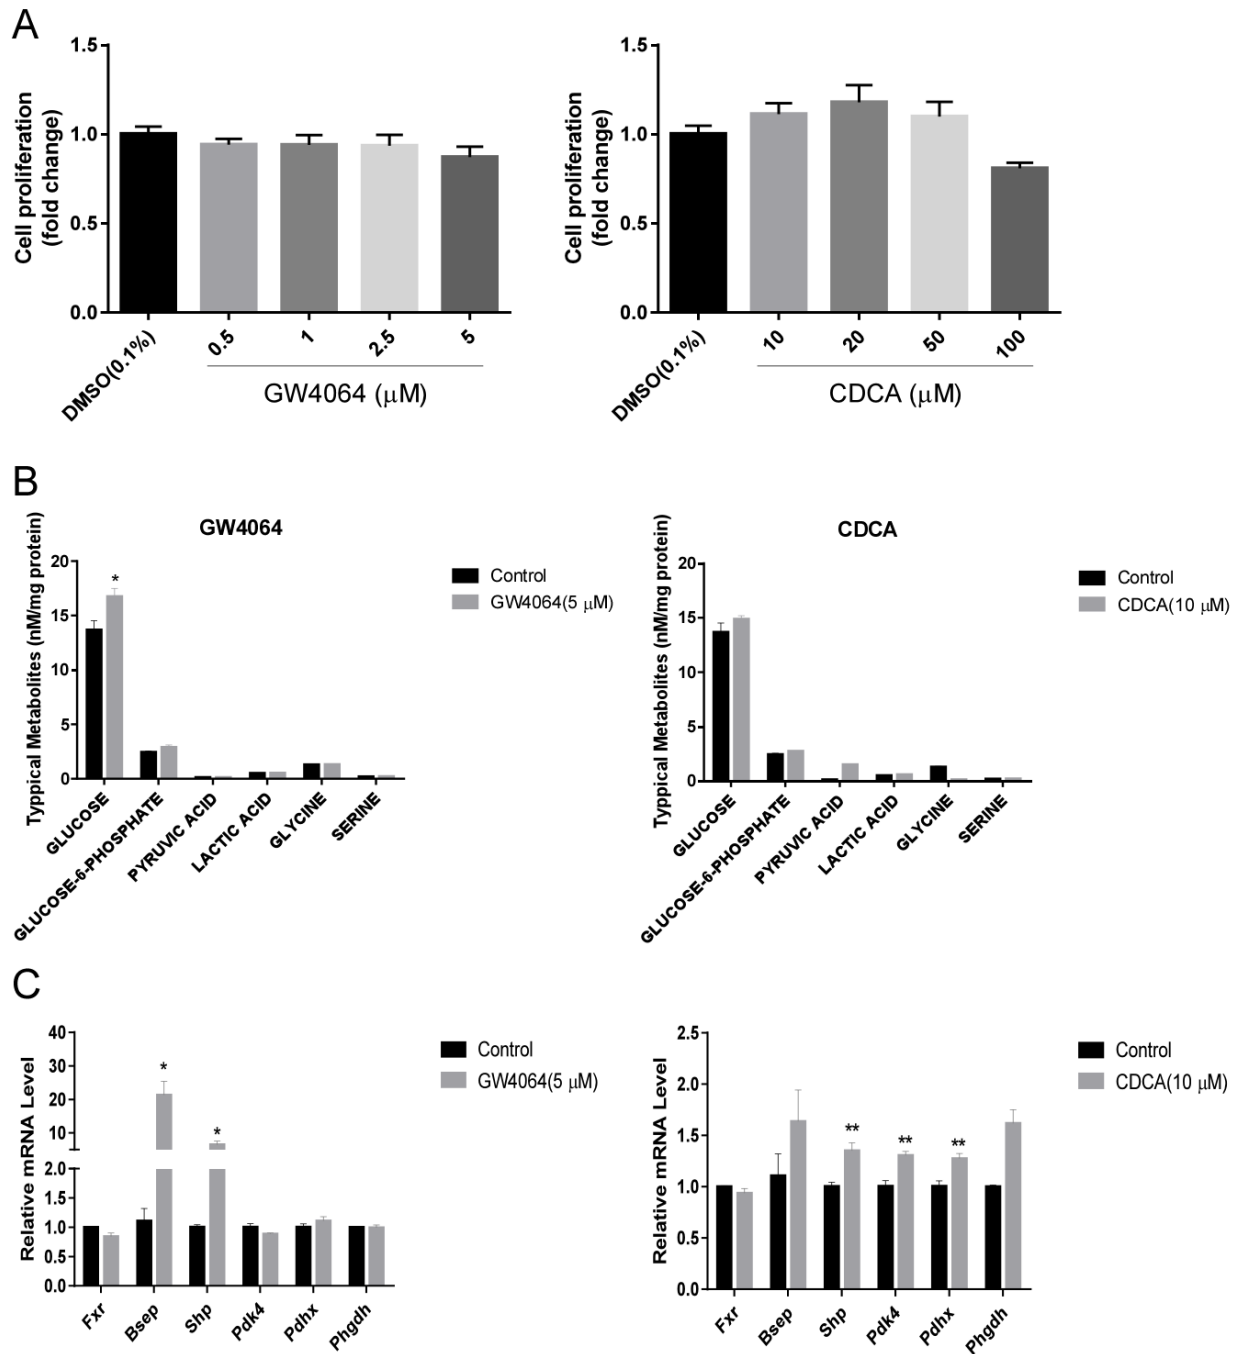

**Fig. S2 FXR agonists failed in triggering proliferation of primary hepatocytes.** (A) MTT assay on primary hepatocytes treated with GW4064 (Left) of CDCA (Right). (B) Targeted metabolomic analysis from primary hepatocytes treated with GW4064 (Left) of CDCA (Right). (C) RT-PCR in testing gene expression on primary hepatocytes after treatment with GW4064 (Left) of CDCA (Right). (n=6; \*,  $P < 0.05$ ; \*\*,  $P < 0.01$ ).

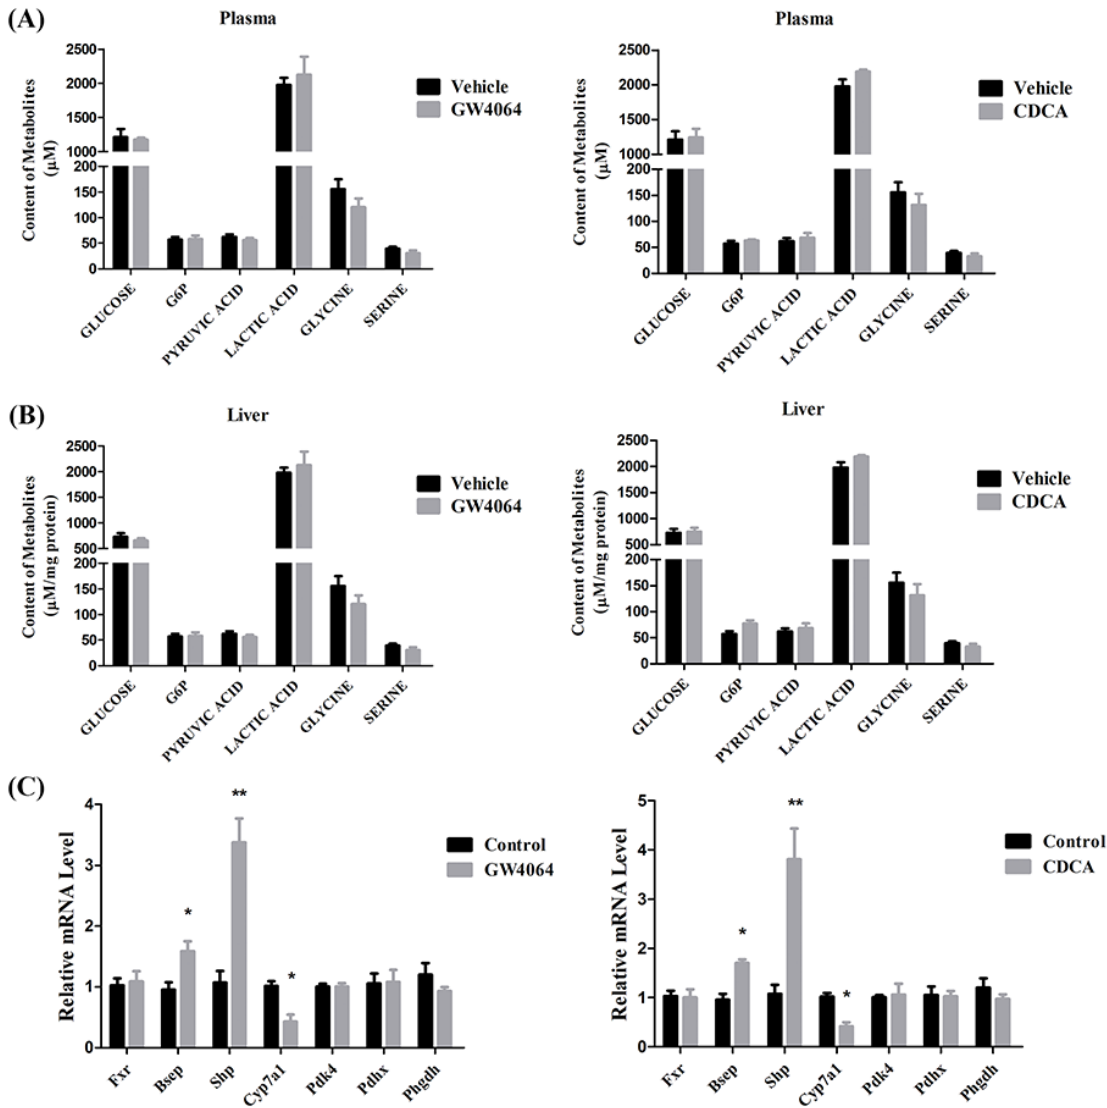

**Fig. S3 FXR activation has little effect on glycolytic metabolism in the liver of healthy mice.** Healthy mice were intraperitoneally administrated with GW4064 (30 mg/kg/day) or CDCA (100 mg/kg/day) for consecutive 3 days. Plasma and liver samples were collected. (A) Concentrations of major intermediates in glycolysis pathway in plasma. (B) Concentration of major intermediates in glycolysis pathway in liver. (C) Gene expression of FXR target genes, including Bsep, Shp, Cyp7a1, Pdk4, Pdhx and Phgdh in liver. Values are presented with mean  $\pm$  SD (n=6; \*,  $P < 0.05$ ; \*\*,  $P < 0.01$ ).

Table. S1

**Table.S1-1 Percent change(%)<sup>b</sup> of major metabolites in the HepG2 cell line (Treatment with GW4064)**

| Superpathway                   | Subpathway                                  | Identified Metabolites   | KEGG ID | Trend <sup>a</sup> | Cell lines |                             | Trend <sup>a</sup> | Medium |                             |
|--------------------------------|---------------------------------------------|--------------------------|---------|--------------------|------------|-----------------------------|--------------------|--------|-----------------------------|
|                                |                                             |                          |         |                    | HepG2      | <i>p</i> value <sup>c</sup> |                    | HepG2  | <i>p</i> value <sup>c</sup> |
| <b>Carbohydrate metabolism</b> | Ascorbate and aldarate metabolism           | D-Glucurono-6,3-lactone  | C02670  | ↑                  | 7.22       |                             |                    |        |                             |
|                                | Ascorbate and aldarate metabolism           | Threonic acid            | C01620  | ↑                  | 58.76      |                             |                    |        |                             |
|                                | Citrate cycle (TCA cycle)                   | Citric acid              | C00158  |                    | 7.86       |                             | ↓                  | -15.26 |                             |
|                                | Citrate cycle (TCA cycle)                   | Fumaric acid             | C00122  | ↑                  | 30.05      | *                           |                    |        |                             |
|                                | Citrate cycle (TCA cycle)                   | Malic acid               | C00149  |                    | 31.56      | *                           |                    | 15.68  |                             |
|                                | Fructose and mannose metabolism             | D-Fructose               | C00095  | ↓                  | -7.51      |                             |                    | -60.89 | *                           |
|                                | Galactose metabolism                        | D-Galactose              | C00124  | ↑                  | 32.31      | **                          |                    | 5.85   |                             |
|                                | Galactose metabolism                        | Sucrose                  | C00089  |                    | 2.44       |                             |                    | 17.78  |                             |
|                                | Glycolysis / Gluconeogenesis                | D-Glucose                | C00031  | ↑                  | 35.83      | **                          | ↓                  | -0.16  |                             |
|                                | Glycolysis / Gluconeogenesis                | Glucose 6-phosphate      | C00668  | ↑                  | 3.13       |                             |                    | 46.98  |                             |
|                                | Glycolysis / Gluconeogenesis                | L-Lactic acid            | C00186  | ↑                  | 9.05       | **                          |                    | 4.00   |                             |
|                                | Glycolysis / Gluconeogenesis                | Pyruvic acid             | C00022  |                    | -2.80      |                             |                    | -2.28  |                             |
|                                | Inositol phosphate metabolism               | Myo-inositol 1-phosphate | C01177  |                    | -14.67     | **                          |                    | 7.69   |                             |
| Pyruvate metabolism            | Propylene glycol                            | C00583                   |         | -16.45             | *          |                             | 3.12               |        |                             |
| <b>Nucleotide metabolism</b>   | Purine metabolism                           | Adenine                  | C00147  | ↓                  | -14.05     | *                           |                    |        |                             |
|                                | Purine metabolism                           | Urea                     | C00086  | ↑                  | 2.74       |                             | ↓                  | -7.54  |                             |
| <b>Amino acid metabolism</b>   | Alanine, aspartate and glutamate metabolism | D-Aspartic acid          | C00402  |                    | 18.47      | *                           |                    | 41.31  |                             |
|                                | Alanine, aspartate and glutamate metabolism | L-Asparagine             | C00152  | ↑                  | 35.30      | ***                         |                    |        |                             |
|                                | Alanine, aspartate and glutamate metabolism | L-Glutamic acid          | C00025  |                    | 15.89      | *                           |                    | 1.04   |                             |
|                                | Alanine, aspartate and glutamate metabolism | L-Glutamine              | C00064  | ↑                  | 50.43      | ***                         | ↓                  | -1.16  |                             |
|                                | Arginine and proline metabolism             | L-Proline                | C00148  | ↑                  | 4.78       |                             |                    | 3.52   |                             |
|                                | Arginine and proline metabolism             | N-Acetylglutamic acid    | C00624  |                    | 15.89      | *                           | ↓                  | -4.80  |                             |
|                                | Arginine and proline metabolism             | Spermidine               | C00315  | ↓                  | -62.37     | **                          |                    |        |                             |

|                         |                                            |                      |        |   |        |     |   |        |
|-------------------------|--------------------------------------------|----------------------|--------|---|--------|-----|---|--------|
|                         | Cyanoamino acid metabolism                 | Alanine              | C01401 | ↑ | 18.47  |     |   | 1.23   |
|                         | Cyanoamino acid metabolism                 | Cysteine             | C00736 | ↑ | 42.41  | *** | ↓ | -5.12  |
|                         | Glutathione metabolism                     | Putrescine           | C00134 | ↑ | 304.71 | *** | ↓ | -14.08 |
|                         | Glutathione metabolism                     | Pyroglutamic acid    | C01879 | ↑ | 28.36  | *** | ↓ | -7.37  |
|                         | Glycine, serine and threonine metabolism   | Glycine              | C00037 | ↑ | 10.77  | *   |   | 41.81  |
|                         | Glycine, serine and threonine metabolism   | L-Cystathionine      | C02291 | ↓ | -6.17  |     |   |        |
|                         | Glycine, serine and threonine metabolism   | L-Serine             | C00065 |   | -2.06  |     | ↓ | -10.16 |
|                         | Glycine, serine and threonine metabolism   | L-Threonine          | C00188 | ↑ | 58.76  | **  |   | 3.08   |
|                         | Glycine, serine and threonine metabolism   | L-Tryptophan         | C00078 |   | 18.71  | **  |   | 2.45   |
|                         | Lysine biosynthesis                        | L-Lysine             | C00047 |   | 12.38  | *   |   | 3.43   |
|                         | Phenylalanine metabolism                   | L-Phenylalanine      | C00079 | ↑ | 19.98  | **  | ↓ | -2.11  |
|                         | Valine, leucine and isoleucine degradation | L-Isoleucine         | C00407 | ↑ | 20.54  | **  |   | 2.92   |
|                         | Valine, leucine and isoleucine degradation | L-Valine             | C00183 | ↑ | 18.47  |     |   | 0.54   |
| <b>Lipid Metabolism</b> | Fatty acid biosynthesis                    | Oleic acid           | C00712 | ↑ | 3.62   |     | ↓ | -75.97 |
|                         | Fatty acid biosynthesis                    | Stearic acid         | C01530 | ↑ | 3.74   |     | ↓ | -55.64 |
|                         | Glycerolipid metabolism                    | Glycerol 3-phosphate | C00093 |   | -6.96  |     | ↓ | -61.75 |
|                         | Steroid biosynthesis                       | Cholesterol          | C00187 | ↑ | 14.01  | *   |   | -20.44 |

<sup>a</sup>Change trend of relative amounts of the GW4064 group compared to the Control group. ( ↑): up-regulated. ( ↓): down-regulated.

<sup>b</sup>The fold change of relative amounts of the GW4064 group compared to the Control group.

<sup>c</sup>Statistical p value calculated using the independent 't' test (significance at  $p < 0.05$ )

Table.S1-2 Percent change(%)<sup>b</sup> of major metabolites in the HepG2 cell line (Treatment with CDCA)

|                                            | Subpathway                                  | Identified Metabolites   | KEGG ID | Trend <sup>a</sup> | Cell lines |                             | Trend <sup>a</sup> | Medium |                             |
|--------------------------------------------|---------------------------------------------|--------------------------|---------|--------------------|------------|-----------------------------|--------------------|--------|-----------------------------|
|                                            |                                             |                          |         |                    | HepG2      | <i>p</i> value <sup>c</sup> |                    | HepG2  | <i>p</i> value <sup>c</sup> |
| <b>Carbohydrate metabolism</b>             | Carbon fixation pathways in prokaryotes     | 4-Hydroxybutyric acid    | C00989  |                    | 8.41       |                             |                    |        |                             |
|                                            | Citrate cycle (TCA cycle)                   | Citric acid              | C00158  |                    | 6.93       |                             |                    | -3.02  |                             |
|                                            | Fructose and mannose metabolism             | D-Mannose                | C00159  |                    | 19.04      |                             |                    | -1.48  |                             |
|                                            | Fructose and mannose metabolism             | D-Fructose               | C00095  | ↑                  | 19.04      |                             | ↓                  | -12.19 |                             |
|                                            | Glycolysis / Gluconeogenesis                | D-Lactic acid            | C00256  | ↑                  | 11.71      | **                          |                    | -2.98  | *                           |
|                                            | Glycolysis / Gluconeogenesis                | D-Glucose                | C00031  | ↑                  | 46.59      | **                          | ↓                  | -1.78  | *                           |
|                                            | Glycolysis / Gluconeogenesis                | Glucose 6-phosphate      | C00668  | ↑                  | 13.42      | **                          |                    | 3.09   |                             |
|                                            | Glycolysis / Gluconeogenesis                | Pyruvic acid             | C00022  |                    | 12.95      | ***                         |                    | 3.76   |                             |
|                                            | Inositol phosphate metabolism               | Myoinositol              | C00137  |                    | 428.83     | *                           | ↓                  | -0.56  |                             |
|                                            | Pentose phosphate pathway                   | D-Ribose                 | C00121  |                    | -4.94      |                             |                    | 0.39   |                             |
|                                            | Pyruvate metabolism                         | Malic acid               | C00149  |                    | -4.65      |                             |                    | -37.05 | *                           |
| <b>Nucleotide metabolism</b>               | Purine metabolism                           | Hypoxanthine             | C00262  |                    | 31.25      | *                           |                    |        |                             |
|                                            | Purine metabolism                           | Urea                     | C00086  | ↑                  | 45.22      | **                          |                    | 75.77  |                             |
|                                            | UMP biosynthesis                            | Uridine 5'-monophosphate | C00105  |                    | 6.89       |                             |                    |        |                             |
| <b>Amino acid metabolism</b>               | Alanine, aspartate and glutamate metabolism | Alanine                  | C01401  |                    | 25.20      | **                          |                    | 8.17   | **                          |
|                                            | Alanine, aspartate and glutamate metabolism | L-Asparagine             | C00152  |                    | 25.65      |                             |                    |        |                             |
|                                            | Alanine, aspartate and glutamate metabolism | L-Aspartic acid          | C00049  |                    | 34.99      | **                          |                    | 24.57  | **                          |
|                                            | Arginine and proline metabolism             | Creatinine               | C00791  | ↑                  | 0.48       |                             |                    | 19.94  |                             |
|                                            | Arginine and proline metabolism             | L-Proline                | C00148  |                    | -6.88      |                             |                    | 1.18   |                             |
|                                            | Cysteine and methionine metabolism          | Cysteine                 | C00736  |                    | -1.79      |                             |                    | 19.94  | **                          |
|                                            | Glycine, serine and threonine metabolism    | Glycine                  | C00037  |                    | 17.78      |                             |                    | 10.84  | **                          |
|                                            | Glycine, serine and threonine metabolism    | L-Threonine              | C00188  |                    | 24.65      | **                          |                    | 4.08   | *                           |
|                                            | Glycine, serine and threonine metabolism    | L-Serine                 | C00065  |                    | 22.81      | **                          |                    | 19.66  | *                           |
|                                            | Lysine biosynthesis                         | L-Lysine                 | C00047  |                    | -3.93      |                             |                    | 2.51   |                             |
|                                            | Phenylalanine metabolism                    | L-Phenylalanine          | C00079  |                    | 34.14      | **                          |                    | 13.42  | ***                         |
|                                            | Tyrosine metabolism                         | L-Tyrosine               | C00082  | ↑                  | 41.70      |                             |                    | 46.04  |                             |
|                                            | Tyrosine metabolism                         | N-Acetylglutamic acid    | C00624  |                    | -24.91     | *                           |                    | -13.66 |                             |
|                                            | Valine, leucine and isoleucine degradation  | N-Acetyl-L-aspartic acid | C01042  |                    | -71.12     |                             |                    |        |                             |
| Valine, leucine and isoleucine degradation | L-Valine                                    | C00183                   |         | 24.95              | *          |                             | 7.88               |        |                             |
| Valine, leucine and isoleucine degradation | L-Isoleucine                                | C00407                   | ↑       | 36.93              | **         |                             | 5.36               |        |                             |
| <b>Lipid metabolism</b>                    | Biosynthesis of unsaturated fatty acids     | Arachidonic acid         | C00219  | ↑                  | 8.05       |                             |                    | 7.79   |                             |
|                                            | Biosynthesis of unsaturated fatty acids     | Oleic acid               | C00712  | ↑                  | 40.30      | **                          |                    | -49.61 |                             |
|                                            | Biosynthesis of unsaturated fatty acids     | Palmitic acid            | C00249  |                    | 30.84      | **                          |                    | 18.89  |                             |

|                                             |                                         |                      |        |   |        |    |   |        |
|---------------------------------------------|-----------------------------------------|----------------------|--------|---|--------|----|---|--------|
|                                             | Biosynthesis of unsaturated fatty acids | Palmitoleic acid     | C08362 |   | 16.97  |    |   |        |
|                                             | Biosynthesis of unsaturated fatty acids | Stearic acid         | C01530 | ↑ | 35.56  | ** |   | 19.66  |
|                                             | Glycerolipid metabolism                 | Propane-1,3-diol     | C02457 |   | 1.75   |    |   | -2.92  |
|                                             | Glycerophospholipid metabolism          | Glycerol 3-phosphate | C00093 |   | -11.82 |    |   | -13.63 |
|                                             | Primary bile acid biosynthesis          | Cholesterol          | C00187 |   | 26.72  | ** |   |        |
| <b>Metabolism of other amino acids</b>      | D-Glutamineand D-glutamate metabolism   | L-Glutamine          | C00064 | ↑ | 26.74  | *  | ↓ | -12.19 |
|                                             | D-Glutamine and D-glutamatemetabolism   | L-Glutamic acid      | C00025 |   | 11.54  |    |   | 31.57  |
|                                             | Glutathione metabolism                  | Cadaverine           | C01672 |   | 40.43  |    |   | 19.94  |
| <b>Metabolism of cofactors and vitamins</b> | Nicotinate and nicotinamidemetabolism   | Niacinamide          | C00153 | ↑ | -50.86 |    |   | -49.61 |
|                                             | Vitamin digestion and absorption        | Pantothenic acid     | C00864 | ↑ | 29.89  | *  |   | 8.58   |

<sup>a</sup>Change trend of relative amounts of the CDCA group compared to the Control group. (↑): up-regulated. (↓): down-regulated.

<sup>b</sup>The fold change of relative amounts of the CDCA group compared to the Control group.

<sup>c</sup>Statistical p value calculated using the independent 't' test (significance at  $p < 0.05$ )



Table S2

## Primer sequences for qRT-PCR(human)

| Gene  | Sequence               | Locus          |
|-------|------------------------|----------------|
| Glut1 | TATGTGGAGCAACTGTGT     | NM_006516.2    |
|       | GAAGTAGGTGAAGATGAAGAAC |                |
| PFKL  | GATGATGTTGGAGACGCTCA   | NM_002626.4    |
|       | GGTGCCAAAGTCTTCCTCAT   |                |
| G3PDH | TATGACAACAGCCTCAAGAT   | NM_001256799.1 |
|       | GAGTCCTTCCACGATAACC    |                |
| PDK1  | GGAGGTCTCAACACGAGGTC   | NM_002610.3    |
|       | CGCTGGGTAATGAGGATTTG   |                |
| PDK4  | CACGATGTGAATTGGTTGGT   | NM_002612.3    |
|       | TGCCTTTGAGTGTTCAAGGA   |                |
| PKLR  | GAGAAGTTGAGTCGCGCAAT   | NM_181871.3    |
|       | CAGTACCAGCATCATTGCCA   |                |
| PKM   | CTTCACTATGGGGCTTCGAC   | NM_001206796.1 |
|       | TCAGAGAGAGGAGAACGGCT   |                |
| PDHX  | AGGCTTACTTACTCCAATCA   | NM_001166158.1 |
|       | GGTATTCTTCAGGCAACAAT   |                |
| HKI   | CATTCGTAAGGTCCATTC     | NM_000188.2    |
|       | CTCCATGTGAACATTCTG     |                |
| HKII  | ACAATGGATGCCTAGATG     | NM_000189.4    |
|       | AGGTACATTCCACTGATC     |                |
| FGFR4 | ACAGCTCTCAGGGACCCAAG   | NM_213647.1    |
|       | GCTGGAGCTGGGAGTGAG     |                |
| SHP   | ACTTCACACAGCACCCAGTG   | NM_021969.2    |
|       | AGGGACCATCCTCTTCAACC   |                |
| BSEP  | CATTCGCTCTCGATGTTCA    | NM_003742.2    |
|       | TTCCAGGAAAAGCATGTGTG   |                |
| FXR   | CACAGCGTTTTTGGTAATGC   | NM_001206993.1 |
|       | TTGTTTGTGGAGACAGAGCCT  |                |

|       |                                              |             |
|-------|----------------------------------------------|-------------|
| PHGDH | TTCTCAGCTGCGTTGATGAC<br>GCAAAGAGGAGCTGATAGCG | NM_006623.3 |
| FASN  | TGAGGTTGTCCAGAACTCC<br>CTCCAGCCTCGCTCTCC     | NM_004104.4 |
| ACTB  | GTTGTCGACGACGAGCG<br>GCACAGAGCCTCGCCTT       | NM_001101.3 |

Table S3

**Primer sequences for qRT-PCR(mouse)**

| <b>Gene</b> | <b>Sequence</b>                               | <b>Locus</b>   |
|-------------|-----------------------------------------------|----------------|
| Pdk4        | TGACAGGGCTTTCTGGTCTT<br>AGTGAACACTCCTTCGGTGC  | NM_013743.2    |
| Pdhx        | GTTCCCTTGCTCCATCGTAG<br>GAGCAAGTTGGAGGTGGTTT  | NM_175094.5    |
| Fgfr4       | CAGGTCTGCCAAATCCTTGT<br>CAGAGGCCTTTGGTATGGAT  | NM_008011.2    |
| Shp         | AGACTTCACACAGTGCCCAG<br>AGCTGGGTCCCAAGGAGTAT  | NM_011850.2    |
| Bsep        | AAGGACAGCCACACCAACTC<br>CCAGAACATGACAAACGGAA  | NM_021022.3    |
| Fxr         | GAAACTGAACATCGGGGTTAT<br>CGGCGGAGATTTTCAATAAG | NM_001163700.1 |
| Phgdh       | ACCTTCATCCACAATGCCTC<br>GGAGATCTGGCCTCTCTGTG  | NM_016966.3    |
| Fasn        | ATGTCCACACCACCAATGAG<br>CTCGCTTGTCGTCTGCCT    | NM_007988.3    |
| Actb        | ATGGAGGGGAATACAGCCC<br>TTCTTTGCAGCTCCTTCGTT   | NM_007393.3    |

Table S4

**Sequences of small interfering RNA**

| <b>siRNA</b> | <b>Sequence</b>                                        |
|--------------|--------------------------------------------------------|
| NR1H4        | UCAGAGAUACCACUAUUUCGAAUUC<br>GAAUUCGAAAUAGUGGUAUCUCUGA |
| PDK4         | AUAAAGAGUAGAGAUUCAGAUCUCC<br>GGAGAUCUGAAUCUCUACUCUUUAU |

## Methods

### *Primary hepatocyte isolation, culture and treatment*

Primary mouse hepatocytes were isolated following a two-step in situ collagenase perfusion method as described previously. Hepatocytes were seeded at subconfluence ( $0.5 \times 10^6$ / ml) in Williams E Medium (Gibco, Life Technologies, Carlsbad, CA) supplemented with 10 % (v/v) fetal bovine serum (Hyclone, Logan, Utah), 0.1  $\mu$ M dexamethasone, 10  $\mu$ g/ml insulin, 2 mM L-glutamine, and 100  $\mu$ g/ml penicillin and streptomycin in collagen I-coated cell plate. Four hour after incubation, the cells were washed and incubated in serum-free Williams E Medium. Hepatocytes were cultured at 37 °C, 5 % CO<sub>2</sub>, and 95% relative humidity. After 24 h in serum-free cultivation medium, hepatocytes were washed with PBS and were stimulated with GW4064 and CDCA for another 24 h.

For cell proliferation assay, primary mouse hepatocytes were seeded in 96-well plates and treated with GW4064 at concentrations of 0.5, 1, 2.5, and 5  $\mu$ M or CDCA at concentrations of 10, 20, 50, and 100  $\mu$ M for 24 h. Cell proliferation was tested through MTT method. For gene expression and metabonomics analysis, hepatocytes were seeded in 6-well plates and treated with GW4064 and CDCA at the concentration of 5 or 10  $\mu$ M for 24 h.

### *Animals and Treatments*

Specific pathogen free (SPF) male C57BL/6 mice (8 wk old, 20 g) were obtained from Comparative Medicine Centre of Yangzhou University, China. The animal studies were approved by the Animal Ethics Committee of China Pharmaceutical University and have been carried out in accordance with the Declaration of Helsinki. Animals were housed in an air-conditioned room (25 °C) under a 12 h light/dark cycle for 1 week before experiments and allowed water and standard chow *ad libitum*. Mice were treated with GW4064 (30 mg/kg/day, *i.p*) or CDCA (100 mg/kg/day, *i.p*) once a day for consecutive 3 days. 24 h after the last dose, liver and plasma were collected and kept at -80 °C for further analysis. Concentrations of major intermediates in glycolysis pathway in plasma and liver were detected by GC-MS as described above. mRNA levels of main FXR target genes in liver were detected by RT-PCR method.
